# Supplementary material for: Air-assisted activation strategy for porous carbon spheres to give enhanced electrochemical performance
Source: Royal Society of Chemistry journal article supplement (doi:10.1039/c5ra26263a), 2016-01-01
Supplement: c5ra26263a1.pdf [file c5ra26263a1.pdf]

## Electronic Supplementary Information

### **An air-assisted activation strategy for porous carbon spheres, and its enhanced electrochemical performance**

Huaqing Xuan,<sup>a</sup> Yiliang Wang,<sup>a</sup> Gaoxing Lin,<sup>a</sup> Fan Wang,<sup>a</sup> Lin Zhou<sup>a</sup>, Xiaoping Dong<sup>a\*</sup> and Zhi Chen<sup>b\*</sup>

<sup>a</sup> Department of Chemistry, School of Sciences, Zhejiang Sci-Tech University, 928 Second Avenue, Xiasha Higher Education Zone, Hangzhou, China.

*Fax: +86 571 86843228; Tel: +86 571 86843228; E-mail: xpdong@zstu.edu.cn*

<sup>b</sup> College of Materials Science and Engineering, China Jiliang University, 258 Xueyuan Street, Xiasha Higher Education Zone, Hangzhou310018, China.

*Fax: +86 571 86835738; Tel: 189 690 29559; E-mail: zchen@gmail.com*

**Table S1** The enhancement of calculated specific capacitance in CV results at the scan rate of 50 mV s<sup>-1</sup>

1

| Sample | Capacitance<br>(F g <sup>-1</sup> ) |
|--------|-------------------------------------|
| AACS-1 | 114                                 |
| AACS-2 | 126                                 |
| AACS-3 | 133                                 |
| AACS-4 | 149                                 |
| AACS-5 | 174                                 |
| AACS-6 | 206                                 |

**Table S2** The comparison of structure and performance of different porous carbon materials

| Carbon source | Activating agent        | $S_{\text{BET}}$<br>( $\text{cm}^2 \text{g}^{-1}$ ) | Capacitance<br>( $\text{F g}^{-1}$ ) | Electrolyte               | Ref |
|---------------|-------------------------|-----------------------------------------------------|--------------------------------------|---------------------------|-----|
| RF resin      | Air                     | 2178                                                | 212                                  | KOH                       | --  |
| FDU-15        | KOH                     | 1410                                                | 200                                  | KOH                       | 22  |
| RF resin      | $\text{ZnCl}_2$         | 2437                                                | 204                                  | KOH                       | 23  |
| Firewoods     | Steam                   | 1131                                                | 120                                  | Acidic                    | 25  |
| ACFs          | NaOH                    | 3291                                                | 187                                  | IL                        | 12  |
| Glucose       | $\text{ZnCl}_2$         | 2500                                                | 196                                  | KOH                       | 38  |
| Eggplant      | --                      | 950                                                 | 121                                  | $\text{Li}_2\text{SO}_4$  | 37  |
| Cotton stalk  | $\text{H}_3\text{PO}_4$ | 1481                                                | 114                                  | $\text{Et}_4\text{NBF}_4$ | 24  |

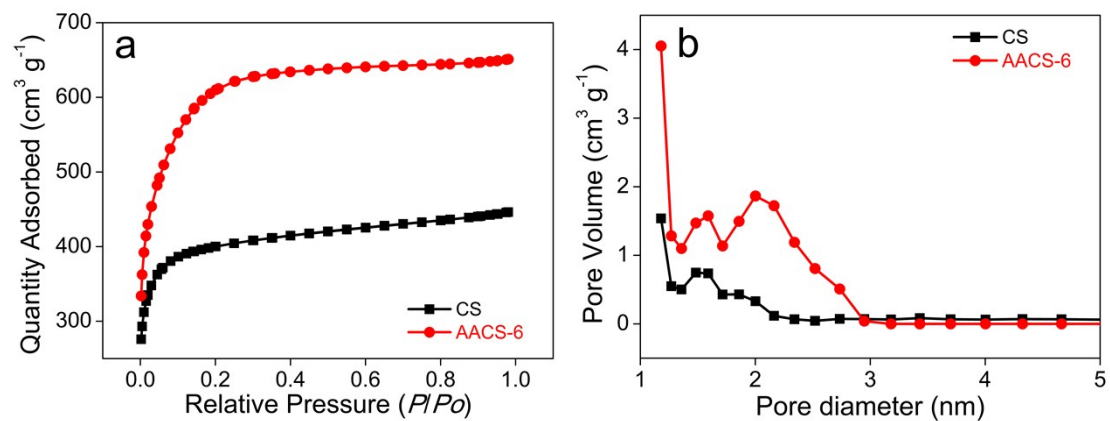

**Fig. S1** N<sub>2</sub> adsorption-desorption isotherm (a) and the pore size distribution curves (b) of AACS-6 and

CS.

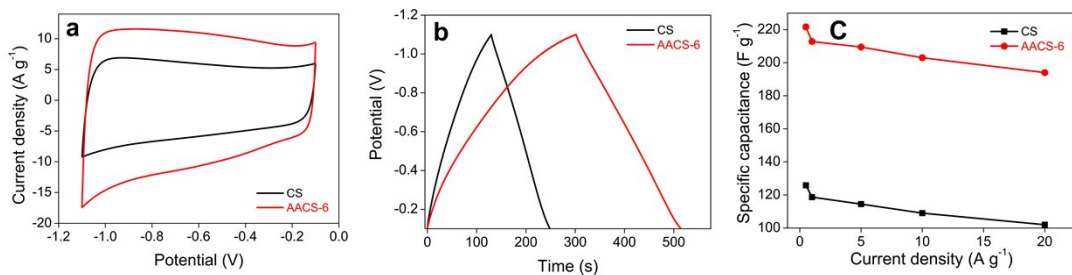

**Fig. S2** Electrochemical capacitive behaviors of AACS-6 and CS. (a) CV measurements at the scan rate of  $50 \text{ mV s}^{-1}$ ; (b) Galvanostatic charge-discharge profiles at the current density of  $1 \text{ A g}^{-1}$ ; (c) Specific capacitance measured at different scan rates.
